# Supplementary material
Source: publisher figshare collection journal article supplement (https://tandf.figshare.com/ndownloader/files/16705247)
Supplement: Supplementary file 1 [file 16705247]

Supplement 1 – Comparison between 1964 and 2017 floras (Abs. fr. = absolute frequency; % fr. = percentage frequency; Φ = fidelity value), sorted by frequency in 2017. For alien species, the introduction moment (“Intr.”; A = Archaeophyte; N = Neophyte) and the naturalization status (“nat. st.”; CAS = Casual; NAT = Naturalized; INV = Invasive) in Latium are reported.

| **Survey** | **Intr. + nat. st.** | **2017** | | **1964** | |
| --- | --- | --- | --- | --- | --- |
| **Frequency** | **Abs. fr.** | **% fr.** | **Abs. fr.** | **% fr.** |
| *Sorghum halepense* | A INV | 12 | 54.5 | 1 | 4.8 |
| *Cyperus rotundus* | - | 11 | 50.0 | 3 | 14.3 |
| *Convolvulus arvensis* | - | 10 | 45.5 | 13 | 61.9 |
| *Chenopodium album* | - | 9 | 40.9 | 15 | 71.4 |
| *Portulaca oleracea* | - | 9 | 40.9 | 11 | 52.4 |
| *Paspalum distichum* | N INV | 8 | 36.4 | 0 | 0.0 |
| *Datura stramonium* | N INV | 7 | 31.8 | 0 | 0.0 |
| *Setaria italica* subsp*. viridis* | - | 6 | 27.3 | 7 | 33.3 |
| *Amaranthus retroflexus* | N INV | 6 | 27.3 | 2 | 9.5 |
| *Abutilon theophrasti* | A INV | 6 | 27.3 | 0 | 0.0 |
| *Cynodon dactylon* | - | 6 | 27.3 | 16 | 76.2 |
| *Rumex crispus* | - | 5 | 22.7 | 0 | 0.0 |
| *Raphanus raphanistrum* subsp*. landra* | - | 5 | 22.7 | 0 | 0.0 |
| *Xanthium italicum* | N INV | 4 | 18.2 | 0 | 0.0 |
| *Convolvulus sepium* | - | 4 | 18.2 | 1 | 4.8 |
| *Solanum nigrum* | - | 4 | 18.2 | 10 | 47.6 |
| *Echinochloa crus-galli* | - | 4 | 18.2 | 7 | 33.3 |
| *Lolium multiflorum* | - | 4 | 18.2 | 0 | 0.0 |
| *Amaranthus blitum* | - | 4 | 18.2 | 11 | 52.4 |
| *Equisetum ramosissimum* | - | 3 | 13.6 | 0 | 0.0 |
| *Setaria verticillata* | - | 3 | 13.6 | 0 | 0.0 |
| *Digitaria sanguinalis* | - | 3 | 13.6 | 4 | 19.0 |
| *Equisetum telmateia* | - | 3 | 13.6 | 0 | 0.0 |
| *Medicago sativa* | - | 3 | 13.6 | 0 | 0.0 |
| *Ervum tetraspermum* | - | 2 | 9.1 | 0 | 0.0 |
| *Euphorbia helioscopia* | - | 2 | 9.1 | 0 | 0.0 |
| *Euphorbia prostrata* | N INV | 2 | 9.1 | 0 | 0.0 |
| *Polygonum aviculare* | - | 2 | 9.1 | 12 | 57.1 |
| *Senecio vulgaris* | - | 2 | 9.1 | 6 | 28.6 |
| *Cirsium arvense* | - | 2 | 9.1 | 1 | 4.8 |
| *Rumex pulcher* | - | 2 | 9.1 | 0 | 0.0 |
| *Fallopia convolvulus* | - | 2 | 9.1 | 8 | 38.1 |
| *Geranium dissectum* | - | 2 | 9.1 | 2 | 9.5 |
| *Lagurus ovatus* | - | 2 | 9.1 | 0 | 0.0 |
| *Rubus caesius* | - | 2 | 9.1 | 0 | 0.0 |
| *Solanum lycopersicum* | N CAS | 2 | 9.1 | 0 | 0.0 |
| *Xanthium spinosum* | N INV | 2 | 9.1 | 3 | 14.3 |
| *Euphorbia maculata* | N INV | 1 | 4.5 | 0 | 0.0 |
| *Daucus carota* | - | 1 | 4.5 | 1 | 4.8 |
| *Fumaria officinalis* | - | 1 | 4.5 | 11 | 52.4 |
| *Kickxia spuria* | - | 1 | 4.5 | 5 | 23.8 |
| *Persicaria maculosa* | - | 1 | 4.5 | 2 | 9.5 |
| *Amaranthus blitoides* | N INV | 1 | 4.5 | 0 | 0.0 |
| *Plantago major* | - | 1 | 4.5 | 4 | 19.0 |
| *Rubus ulmifolius* | - | 1 | 4.5 | 0 | 0.0 |
| *Sonchus asper* | - | 1 | 4.5 | 1 | 4.8 |
| *Mercurialis annua* | - | 1 | 4.5 | 1 | 4.8 |
| *Helminthotheca echioides* | - | 1 | 4.5 | 4 | 19.0 |
| *Acer saccharinum* | N CAS | 1 | 4.5 | 0 | 0.0 |
| *Anchusa azurea* | - | 1 | 4.5 | 0 | 0.0 |
| *Avena barbata* | - | 1 | 4.5 | 0 | 0.0 |
| *Ballota nigra* | - | 1 | 4.5 | 0 | 0.0 |
| *Capsicum annuum* | N CAS | 1 | 4.5 | 0 | 0.0 |
| *Chenopodium opulifolium* | - | 1 | 4.5 | 0 | 0.0 |
| *Cichorium intybus* | - | 1 | 4.5 | 0 | 0.0 |
| *Cucurbita pepo* | N CAS | 1 | 4.5 | 0 | 0.0 |
| *Cynoglossum creticum* | - | 1 | 4.5 | 0 | 0.0 |
| *Foeniculum vulgare* | - | 1 | 4.5 | 0 | 0.0 |
| *Gleditsia triacanthos* | N NAT | 1 | 4.5 | 0 | 0.0 |
| *Hibiscus trionum* | N CAS | 1 | 4.5 | 0 | 0.0 |
| *Lathyrus hirsutus* | - | 1 | 4.5 | 0 | 0.0 |
| *Linaria vulgaris* | - | 1 | 4.5 | 0 | 0.0 |
| *Lythrum salicaria* | - | 1 | 4.5 | 0 | 0.0 |
| *Ornithopus compressus* | - | 1 | 4.5 | 0 | 0.0 |
| *Sambucus ebulus* | - | 1 | 4.5 | 0 | 0.0 |
| *Solanum melongena* | A CAS | 1 | 4.5 | 0 | 0.0 |
| *Sonchus oleraceus* | - | 1 | 4.5 | 10 | 47.6 |
| *Sorghum bicolor* | A CAS | 1 | 4.5 | 0 | 0.0 |
| *Vitis vinifera* | - | 1 | 4.5 | 0 | 0.0 |
| *Lolium temulentum* | A NAT | 0 | 0.0 | 15 | 71.4 |
| *Lysimachia arvensis* | - | 0 | 0.0 | 15 | 71.4 |
| *Medicago lupulina* | - | 0 | 0.0 | 8 | 38.1 |
| *Sherardia arvensis* | - | 0 | 0.0 | 8 | 38.1 |
| *Anthemis arvensis* | - | 0 | 0.0 | 7 | 33.3 |
| *Coleostephus myconis* | - | 0 | 0.0 | 7 | 33.3 |
| *Phalaris brachystachys* | - | 0 | 0.0 | 7 | 33.3 |
| *Silene canescens* | - | 0 | 0.0 | 7 | 33.3 |
| *Cerastium arvense* | - | 0 | 0.0 | 6 | 28.6 |
| *Rumex bucephalophorus* | - | 0 | 0.0 | 6 | 28.6 |
| *Veronica persica* | N INV | 0 | 0.0 | 6 | 28.6 |
| *Oxybasis rubra* | - | 0 | 0.0 | 5 | 23.8 |
| *Rumex acetosella* | - | 0 | 0.0 | 5 | 23.8 |
| *Avena fatua* | A NAT | 0 | 0.0 | 4 | 19.0 |
| *Capsella bursa-pastoris* | - | 0 | 0.0 | 4 | 19.0 |
| *Echium vulgare* subsp*. pustulatum* | - | 0 | 0.0 | 4 | 19.0 |
| *Medicago minima* | - | 0 | 0.0 | 4 | 19.0 |
| *Plantago lanceolata* | - | 0 | 0.0 | 4 | 19.0 |
| *Reseda luteola* | - | 0 | 0.0 | 4 | 19.0 |
| *Briza media* | - | 0 | 0.0 | 3 | 14.3 |
| *Echium italicum* | - | 0 | 0.0 | 3 | 14.3 |
| *Euphorbia peplis* | - | 0 | 0.0 | 3 | 14.3 |
| *Heliotropium europaeum* | - | 0 | 0.0 | 3 | 14.3 |
| *Medicago orbicularis* | - | 0 | 0.0 | 3 | 14.3 |
| *Mentha arvensis* | - | 0 | 0.0 | 3 | 14.3 |
| *Papaver rhoeas* | - | 0 | 0.0 | 3 | 14.3 |
| *Reseda phyteuma* | - | 0 | 0.0 | 3 | 14.3 |
| *Setaria pumila* | - | 0 | 0.0 | 3 | 14.3 |
| *Vicia angustifolia* | - | 0 | 0.0 | 3 | 14.3 |
| *Amaranthus albus* | N INV | 0 | 0.0 | 2 | 9.5 |
| *Briza minor* | - | 0 | 0.0 | 2 | 9.5 |
| *Hordeum murinum* subsp*. leporinum* | - | 0 | 0.0 | 2 | 9.5 |
| *Juncus bufonius* | - | 0 | 0.0 | 2 | 9.5 |
| *Lamium amplexicaule* | - | 0 | 0.0 | 2 | 9.5 |
| *Legousia speculum-veneris* | - | 0 | 0.0 | 2 | 9.5 |
| *Myosotis arvensis* | - | 0 | 0.0 | 2 | 9.5 |
| *Plantago coronopus* | - | 0 | 0.0 | 2 | 9.5 |
| *Potentilla reptans* | - | 0 | 0.0 | 2 | 9.5 |
| *Ranunculus repens* | - | 0 | 0.0 | 2 | 9.5 |
| *Reseda alba* | - | 0 | 0.0 | 2 | 9.5 |
| *Silene vulgaris* | - | 0 | 0.0 | 2 | 9.5 |
| *Stachys annua* | - | 0 | 0.0 | 2 | 9.5 |
| *Stellaria media* | - | 0 | 0.0 | 2 | 9.5 |
| *Trifolium stellatum* | - | 0 | 0.0 | 2 | 9.5 |
| *Artemisia vulgaris* | - | 0 | 0.0 | 1 | 4.8 |
| *Bothriochloa ischaemum* | - | 0 | 0.0 | 1 | 4.8 |
| *Buglossoides arvensis* | - | 0 | 0.0 | 1 | 4.8 |
| *Centaurea calcitrapa* | - | 0 | 0.0 | 1 | 4.8 |
| *Centaurea cyanus* | A NAT | 0 | 0.0 | 1 | 4.8 |
| *Cerinthe major* | - | 0 | 0.0 | 1 | 4.8 |
| *Delphinium consolida* | - | 0 | 0.0 | 1 | 4.8 |
| *Diplotaxis tenuifolia* | - | 0 | 0.0 | 1 | 4.8 |
| *Equisetum arvense* | - | 0 | 0.0 | 1 | 4.8 |
| *Erigeron annuus* | N NAT | 0 | 0.0 | 1 | 4.8 |
| *Erigeron canadensis* | N INV | 0 | 0.0 | 1 | 4.8 |
| *Eruca vesicaria* | - | 0 | 0.0 | 1 | 4.8 |
| *Galium tricornutum* | - | 0 | 0.0 | 1 | 4.8 |
| *Lactuca sativa* subsp. *serriola* | - | 0 | 0.0 | 1 | 4.8 |
| *Lathyrus cicera* | - | 0 | 0.0 | 1 | 4.8 |
| *Legousia hybrida* | - | 0 | 0.0 | 1 | 4.8 |
| *Lolium perenne* | - | 0 | 0.0 | 1 | 4.8 |
| *Papaver dubium* | - | 0 | 0.0 | 1 | 4.8 |
| *Ranunculus arvensis* | - | 0 | 0.0 | 1 | 4.8 |
| *Rapistrum rugosum* | - | 0 | 0.0 | 1 | 4.8 |
| *Rumex obtusifolius* | - | 0 | 0.0 | 1 | 4.8 |
| *Silene latifolia* | - | 0 | 0.0 | 1 | 4.8 |
| *Sisymbrium officinale* | - | 0 | 0.0 | 1 | 4.8 |
| *Sonchus arvensis* | - | 0 | 0.0 | 1 | 4.8 |
| *Trifolium repens* | - | 0 | 0.0 | 1 | 4.8 |
| *Urtica dioica* | - | 0 | 0.0 | 1 | 4.8 |
| *Verbena officinalis* | - | 0 | 0.0 | 1 | 4.8 |
